# Supplementary material
Source: Springer Nature journal article supplement (https://www.springermedizin.de/resource/supplementary/12978_2014_330_MOESM2_ESM.pdf/9602474)

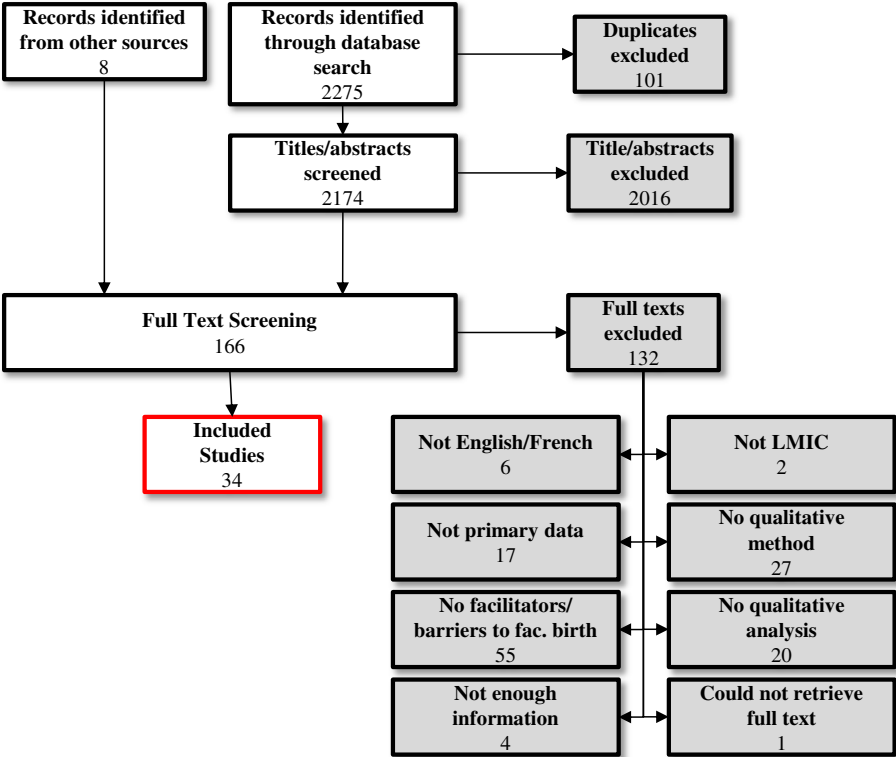

Supplement: MOESM2 [file 9602474]
